# Supplementary material for: Atypical EnteropathogenicEscherichia coliStrains form Biofilm on Abiotic Surfaces Regardless of Their Adherence Pattern on Cultured Epithelial Cells
Source: Hindawi journal article supplement (doi:10.1155/2014/845147), 2014-01-01
Supplement: f1 [file 845147.f1.pdf]

**Table S1. Serotype, adherence pattern on HEp-2 cells (6-h assays) and biofilm formation (OD<sub>595nm</sub> values) of aEPEC strains and controls**

| Biofilm formers strains* |                |                   |                                          | Non-biofilm formers strains |                |                   |                                          |
|--------------------------|----------------|-------------------|------------------------------------------|-----------------------------|----------------|-------------------|------------------------------------------|
| <i>E. coli</i> strain    | Serotype       | Adherence pattern | Biofilm formation (OD <sub>595nm</sub> ) | <i>E. coli</i> strain       | Serotype       | Adherence pattern | Biofilm formation (OD <sub>595nm</sub> ) |
| <i>042</i>               | O44:H18        | AA                | 1.262                                    | <i>DH5α</i>                 |                | NA                | 0.017                                    |
| <i>E2348/69</i>          | <b>O127:H6</b> | LA                | 0.029                                    | BA589                       | O5:H2          | NA                | 0.014                                    |
| BA4047                   | O1:H16         | LAL               | 0.068                                    | BA2294                      | O9:H33         | NA                | 0.003                                    |
| BA92                     | O2:H16         | AA                | 0.093                                    | BA179                       | O23:H16        | NA                | 0.026                                    |
| BA4095                   | O4:H45         | LAL               | 0.039                                    | LB4                         | <b>O26:H11</b> | LAL               | 0.026                                    |
| <i>BA558</i>             | O11:H40        | LA                | 0.070                                    | BA356                       | O33:H7         | NA                | 0.026                                    |
| BA4058                   | O20:H-         | NA                | 0.035                                    | BA 2991                     | O34:H-         | NA                | 0.017                                    |
| BA2103                   | <b>O26:H11</b> | LAL               | 0.072                                    | BA 2923                     | O34:H6         | NA                | 0.028                                    |
| LB5                      | <b>O26:H11</b> | LAL               | 0.067                                    | BA 1324                     | O34:H45        | LAL               | 0.022                                    |
| LB25                     | <b>O26:H11</b> | LAL               | 0.667                                    | BA 442                      | O35:H19        | NA                | 0.020                                    |
| <i>BA2459</i>            | <b>O26:H11</b> | UND               | 0.208                                    | BA 3148                     | O35:H19        | NA                | 0.014                                    |

|             |                |     |       |
|-------------|----------------|-----|-------|
| BA 462      | O51:H40        | IND | 0.046 |
| BA 1768     | O51:H40        | UND | 0.044 |
| <i>LB10</i> | <b>O55:H7</b>  | LAL | 0.843 |
| BA320       | <b>O55:H7</b>  | LAL | 0.032 |
| BA1244      | <b>O55:H7</b>  | LAL | 0.046 |
| BA4147      | <b>O55:H7</b>  | LAL | 0.068 |
| LB17        | <b>O55:H7</b>  | LAL | 0.072 |
| BA4077      | O64:H23        | LAL | 0.081 |
| BA86        | O76:H19        | NA  | 0.056 |
| LB1         | <b>O86:H34</b> | DA  | 0.053 |
| BA655       | O88:H25        | NA  | 0.041 |
| BA852       | O88:H25        | NA  | 0.086 |
| BA3378      | O104:H2        | LAL | 0.153 |
| BA2145      | O105:H7        | AA  | 0.210 |
| BA4135      | O108:H25       | NA  | 0.061 |
| BA714       | <b>O111:H-</b> | LAL | 0.040 |
| LB13        | <b>O111:H9</b> | AA  | 0.062 |

|         |                |     |       |
|---------|----------------|-----|-------|
| BA 2964 | O51:H40        | UND | 0.012 |
| BA 4132 | O51:H48        | LAL | 0.012 |
| BA487   | <b>O55:H7</b>  | LAL | 0.023 |
| LB8     | <b>O55:H7</b>  | LAL | 0.006 |
| BA1738  | O80:H26        | NA  | 0.026 |
| LB2     | <b>O86:H34</b> | DA  | 0.022 |
| BA4013  | O88:H-         | NA  | 0.016 |
| BA2975  | O88:H25        | NA  | 0.019 |
| BA3443  | O88:H25        | NA  | 0.015 |
| BA2613  | O101:H33       | NA  | 0.025 |
| BA3160  | O110:H-        | NA  | 0.024 |
| LB72    | <b>O111:H8</b> | LAL | 0.002 |
| LB40    | <b>O111:H9</b> | AA  | 0.023 |
| BA2775  | O113:H19       | NA  | 0.007 |
| LB16    | <b>O119:H2</b> | LAL | 0.018 |
| LB20    | <b>O119:H2</b> | AA  | 0.025 |
| BA580   | <b>O119:H2</b> | NA  | 0.009 |

|        |                 |     |       |
|--------|-----------------|-----|-------|
| BA956  | <b>O111:H15</b> | NA  | 0.035 |
| BA4192 | <b>O111:H25</b> | UND | 0.088 |
| BA1649 | <b>O111:H38</b> | LAL | 0.041 |
| BA1887 | <b>O111:H38</b> | UND | 0.054 |
| BA3690 | <b>O111:H38</b> | AA  | 0.055 |
| BA4009 | <b>O114:H25</b> | DA  | 0.055 |
| BA1444 | O115:H8         | UND | 0.161 |
| LB15   | <b>O119:H2</b>  | LAL | 0.278 |
| BA2482 | <b>O119:H11</b> | AA  | 0.134 |
| BA3733 | <b>O119:H19</b> | LAL | 0.047 |
| BA3392 | O124:H11        | NA  | 0.088 |
| LB2    | <b>O125:H6</b>  | AA  | 0.036 |
| BA4182 | <b>O125:H6</b>  | UND | 0.045 |
| LB2    | <b>O128:H2</b>  | AA  | 0.254 |
| LB3    | <b>O128:H2</b>  | UND | 0.038 |
| BA1652 | O131:H4         | LAL | 0.061 |
| BA3170 | O145:H2         | UND | 0.074 |

|        |                |     |       |
|--------|----------------|-----|-------|
| BA3157 | <b>O119:H2</b> | LAL | 0.010 |
| LB1    | <b>O125:H6</b> | AA  | 0.013 |
| LB11   | <b>O125:H6</b> | AA  | 0.009 |
| BA2297 | O153:H11       | DA  | 0.018 |
| BA151  | ONT:H9         | NA  | 0.009 |
| BA2853 | ONT:H10        | LAL | 0.011 |
| BA3836 | ONT:H19        | NA  | 0.028 |
| BA3851 | ONT:H38        | LAL | 0.010 |
| BA3977 | ONT:H45        | LAL | 0.006 |

|               |          |     |       |
|---------------|----------|-----|-------|
| BA585         | O157:H16 | AA  | 0.034 |
| BA2062        | O171:H48 | UND | 0.170 |
| <i>BA2073</i> | ONT:H5   | DA  | 0.071 |
| BA2065        | ONT:H5   | NA  | 0.055 |
| BA2117        | ONT:H5   | NA  | 0.058 |
| BA1250        | ONT:H6   | LAL | 0.101 |
| BA2034        | ONT:H10  | LAL | 0.046 |
| <i>BA2468</i> | ONT:H19  | NA  | 0.290 |
| BA365         | ONT:H19  | NA  | 0.029 |
| BA3800        | ONT:H19  | NA  | 0.029 |
| <i>BA4157</i> | ONT:H25  | AA  | 1.449 |
| BA3574        | ONT:H38  | LAL | 0.035 |

ONT, O non-typable; LAL, localized-like adherence; NA, non-adherent; AA, aggregative adherence; UND, undetermined adherence; DA, diffuse adherence; LA, localized adherence. O42, EAEC prototype strain; E2348/69, typical EPEC prototype strains; *DH5a*, K12 *E. coli*; Serotypes and adherence pattern on HEp-2 cells were previously determined [5, 22].

Strains in italic font were analyzed by CFU counting and CLSM. Serotypes in bold font belong to the classical EPEC O serogroups.

\* Strains considered biofilm formers ( $OD_{595}$  readings exceeding the mean plus three standard deviations of the low-biofilm forming control, i.e.,  $\pm 0.0285$ ) [29].
